# Supplementary material for: Circ-BPTF promotes bladder cancer progression and recurrence through the miR-31-5p/RAB27A axis
Source: publisher site journal article supplement (doi:10.18632/aging.101520), 2018-08-09
Supplement: Supplementary file [file aging-v10i8-101520-supplementary-material-SD1.pdf]

A

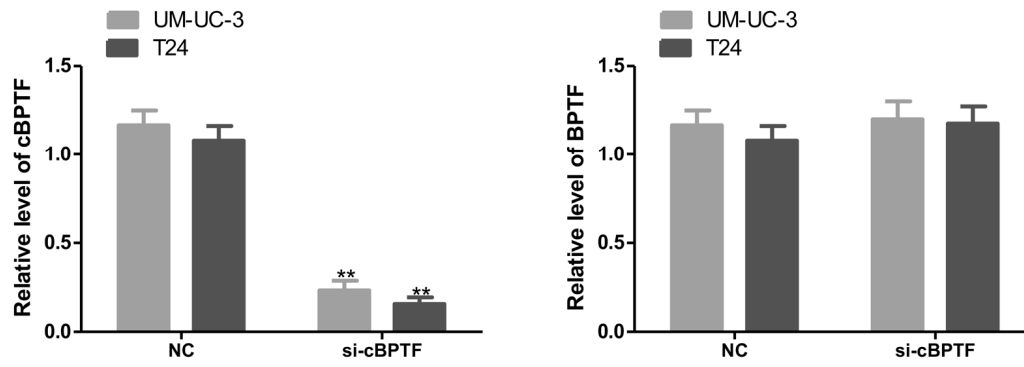

**Figure S1. Knockdown of circ-BPTF had no significant influence on expression of linear BPTF.** (A) Circ-BPTF knockdown only affected the circular transcript, with no significant influence on expression of linear BPTF.
